# Supplementary material for: Are Thoracic Aortic Aneurysm Patients at Increased Risk for Cardiovascular Diseases?
Source: MDPI journal article supplement (doi:10.3390/jcm12010272), 2022-12-29
Supplement: s1 [file s1]

Supplemental Table S1: Study population vs general population

|                      | General<br>population | TAA   |         | Non-TAA |        |
|----------------------|-----------------------|-------|---------|---------|--------|
| Hypertension         | 32.2%                 | 61.4% | p<0.001 | 64.5%   | p<.001 |
| Hypercholesterolemia | 18.3%                 | 21.4% | p=0.524 | 26%     | p=.021 |
| Diabetes mellitus    | 13.9%                 | 1.4%  | p=0.001 | 9.5%    | p=.140 |
| CAD                  | 9.6%                  | 4.3%  | p=0.197 | 8.9%    | p=.887 |

Data are presented as percentages. CAD = Coronary artery disease, TAA = Thoracic aortic aneurysm.

Supplemental Table S2: Baseline characteristics of BAV and TAV patients

|                                  | <u>BAV</u> | <u>TAV</u>  |                   |                |
|----------------------------------|------------|-------------|-------------------|----------------|
| Characteristic                   | n = 87     | n = 152     | OR (95% CI)       | <i>P-value</i> |
| Male                             | 72 (82.2)  | 103 (67.8)  | 2.28 (1.19-4.83)  | .015           |
| Age at surgery                   | 54 (45-62) | 67 (60-73)  | 1.09 (1.06-1.12)  | < .001         |
| Body Mass Index                  | 26.1 ± 4.1 | 26.2 ± 4.1  | 1.01 (0.96-1.08)  | .793           |
|                                  | 82/87*     | 138/152*    |                   |                |
| Family history of CAD            | 11 (12.6)  | 19 (12.5)   | 1.03 (0.46-2.29)  | 1.000          |
| Diabetes                         | 2 (2.3)    | 15 (9.9)    | 4.65 (1.04-20.86) | .035           |
| Hypertension                     | 50 (57.5)  | 102 (67.1)  | 1.54 (0.89-2.57)  | .126           |
| Hypercholesterolemia             | 18 (20.7)  | 41 (27)     | 1.43 (0.76-2.68)  | .280           |
| Preoperative creatinine (μmol/L) | 83 (70-92) | 83 (73-102) | 1.01 (1.00-1.02)  | .118           |
| Previous MI                      | 2 (2.3)    | 16 (10.5)   | 5.00 (1.12-22.29) | .021           |
| Previous PCI                     | 1 (1.1)    | 10 (6.6)    | 6.06 (0.76-48.14) | .060           |
| Previous cardiac surgery         | 2 (2.3)    | 9 (5.9)     | 2.68 (0.57-12.67) | .336           |

\*Denominator represents number of patients for whom this information was known. Data are presented as n (%), mean ± SD or median (interquartile range).

BAV = Bicuspid aortic valve, CAD = Coronary artery disease, MI = Myocardial infarction, PCI = Percutaneous coronary intervention, TAV = Tricuspid aortic valve.

Supplemental Table S3: Perioperative characteristics of BAV and TAV patients

|                              | <u>BAV</u> | <u>TAV</u> |                   |                |
|------------------------------|------------|------------|-------------------|----------------|
| Surgery type                 | n = 87     | n = 152    | OR (95% CI)       | <i>P-value</i> |
| Single AVR                   | 11 (12.6)  | 24 (15.8)  | 1.30 (0.60-2.79)  | .572           |
| AVP                          | 8 (9.2)    | 20 (13.2)  | 1.49 (0.63-3.56)  | .409           |
| Concomitant CABG             | 13 (14.9)  | 33 (21.7)  | 1.58 (0.78-3.19)  | .235           |
| Aortic procedures            |            |            |                   |                |
| Root                         | 57 (65.5)  | 57 (37.5)  | 0.32 (0.18-0.55)  | < .001         |
| Ascending                    | 37 (42.5)  | 46 (30.3)  | 0.59 (0.34-1.02)  | .067           |
| (Hemi)arch                   | 9 (10.3)   | 8 (5.3)    | 0.48 (0.18-1.30)  | .190           |
| Other concomitant procedures |            |            |                   |                |
| Rhythm surgery               | 6 (6.9)    | 28 (18.4)  | 3.05 (1.21-7.69)  | .020           |
| MVP                          | 5 (5.7)    | 36 (23.7)  | 5.09 (1.92-13.52) | < .001         |
| MVR                          | 1 (1.1)    | 10 (6.6)   | 6.06 (0.76-48.14) | .060           |
| TVP                          | 3 (3.4)    | 33 (21.7)  | 7.77 (2.31-26.16) | < .001         |

\*Denominator represents number of patients for whom this information was known. Data are presented as n (%), mean  $\pm$  SD or median (interquartile range).

AVP = Aortic valve plasty, AVR = Aortic valve replacement, BAV = Bicuspid aortic valve, CABG = Coronary artery bypass grafting, MVP = Mitral valve plasty, MVR = Mitral valve replacement, TAV= Tricuspid aortic valve, TVP = Tricuspid valve plasty

Supplemental Figure S1: Sievers classification BAV patients

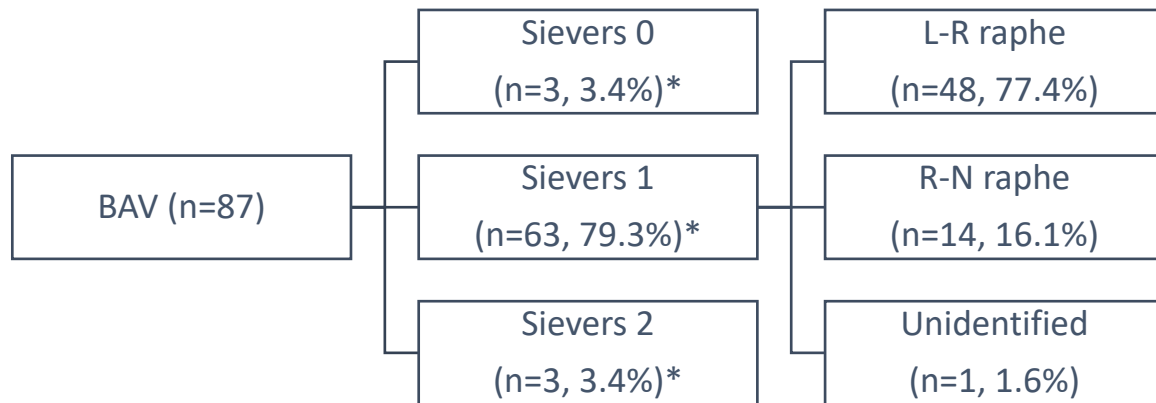

\*Denominator represents number of patients for whom this information was known.

Supplemental Figure S2: CAGE scores in BAV and TAV patients

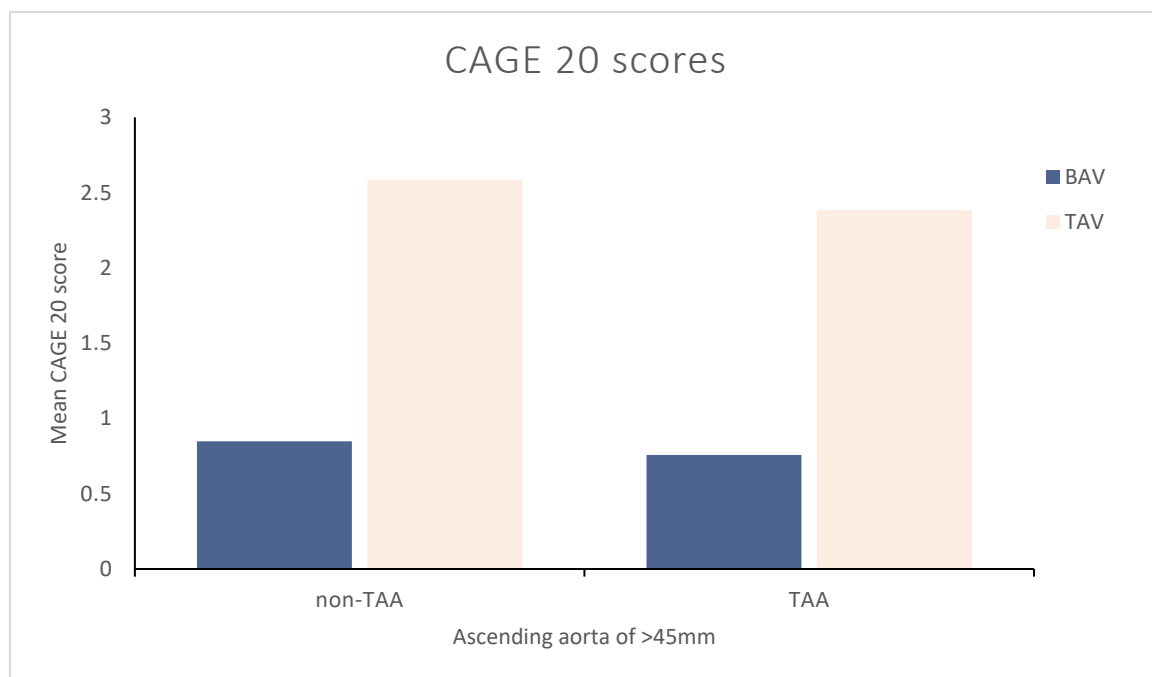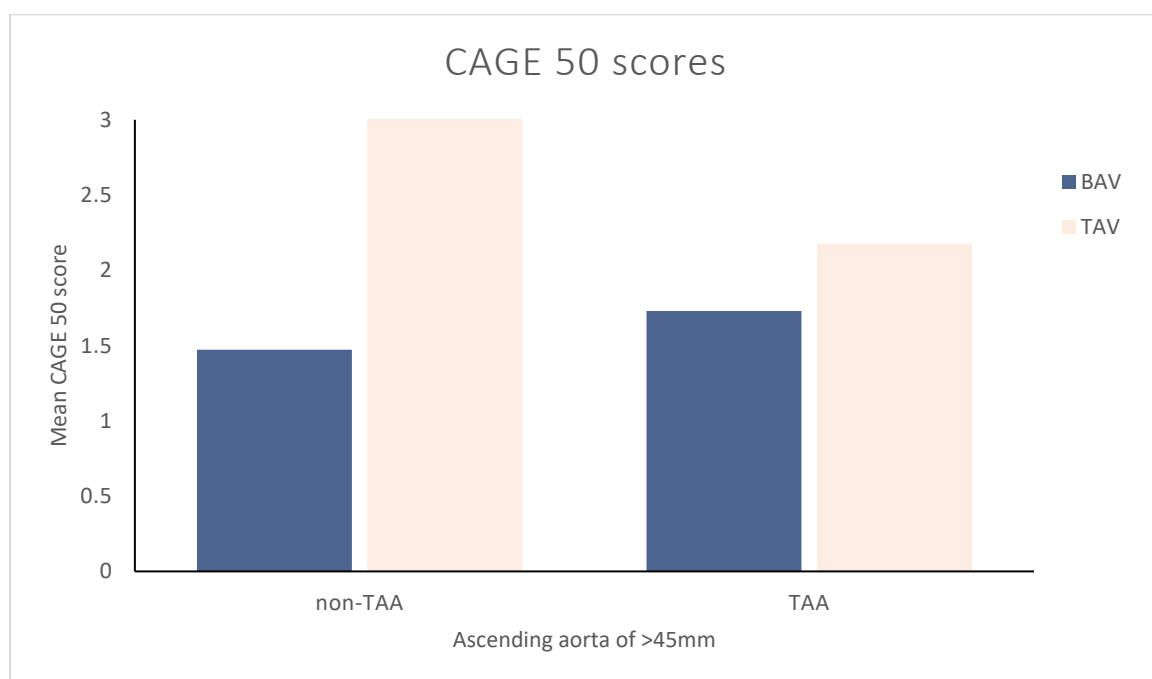

BAV = Bicuspid aortic valve, TAA = Thoracic aortic aneurysm, TAV = Tricuspid aortic valve.
